# Supplementary material
Source: PubMed Central journal article supplement (PMC5660462)
Supplement: MCB.00265-17_zmb999101645s1.pdf [file MCB.00265-17_zmb999101645s1.pdf]

*Molecular and Cellular Biology*

**Supplemental Material**

## **RNF20 Suppresses Tumorigenesis by Inhibiting SREBP1c–PTTG1 Axis in Kidney Cancer**

**Table S1. Primer sequences for qRT-PCR**

**Table S2. Sequences of siRNA oligos**

\*Correspondence and requests for materials should be addressed to Jae Bum Kim, Ph.D.  
(E-mail: jaebkim@snu.ac.kr).

**Table S1. Primer sequences for qRT-PCR**

| Species              | Function               | Gene                   | Sequence (5' to 3')    | Direction |
|----------------------|------------------------|------------------------|------------------------|-----------|
| Human                | E3 Ub ligase           | RNF20                  | CACAGGAGAGCCAAAAGGAG   | Forward   |
|                      |                        |                        | GCATCCTCATCAGCCATTTT   | Reverse   |
|                      | Fatty acid metabolism  | SREBP1c                | CCATGGATTGCACTTTTCGAA  | Forward   |
|                      |                        |                        | CCAGCATAGGGTGGGTCAAA   | Reverse   |
|                      |                        | FASN                   | GCCTACACCCAGAGCTACCG   | Forward   |
|                      |                        |                        | GCCATGGTACTTGGCCTTG    | Reverse   |
|                      |                        | ACC1                   | CAACGAGATTTCACTGTGGCT  | Forward   |
|                      |                        |                        | TTCTGCATTGGCTTTAAGGTCT | Reverse   |
|                      | SCD1                   | ACAAACCTGGCTTGCTGATG   | Forward                |           |
|                      |                        | CCACAGCTCCAAGTGAAACC   | Reverse                |           |
|                      | ELOVL6                 | CTCTGGTCTCTGACCCTTGC   | Forward                |           |
|                      |                        | CTCCTAGTTCCGGTGCTTTG   | Reverse                |           |
|                      | Cholesterol metabolism | SREBP2                 | CAAGCTTCTAAAGGGCATCG   | Forward   |
|                      |                        |                        | GGCTCATCTTTGACCTTTGC   | Reverse   |
|                      |                        | LDLR                   | CCGCCAAGATCAAGAAAGG    | Forward   |
|                      | AAGGAGAAGGGGTGGGC      |                        | Reverse                |           |
|                      | HMGR                   | ATTTGGCAGCTCAGCCATT    | Forward                |           |
|                      |                        | TGAGGAGAAGGATCAGCTATCC | Reverse                |           |
|                      | Cell cycle             | PTTG1                  | GGGTCTGGACCTTCAATCAA   | Forward   |
|                      |                        |                        | GGCAGGAACAGAGCTTTTTTG  | Reverse   |
| PCNA                 |                        | CATGGGCGTGAACCTCACC    | Forward                |           |
|                      |                        | CACAGCTGTACTCCTGTTCTGG | Reverse                |           |
| Cyclin A             |                        | CCTTAGGGAAATGGAGGTTAAA | Forward                |           |
|                      |                        | CCAAATGCAGGGTCTCATT    | Reverse                |           |
| Cyclin D1            | TTCCTCTCCAAAATGCCAGA   | Forward                |                        |           |
|                      | CAGTCCGGGTCACACTTGAT   | Reverse                |                        |           |
| Cyclin E             | TCAGTGGTGCACATAGAGAA   | Forward                |                        |           |
|                      | TGTCCAGCAAATCCAAGCTG   | Reverse                |                        |           |
| Apoptosis            | Bax                    | TTTGCTTCAGGGTTTCATCC   | Forward                |           |
|                      |                        | CAGTTGAAGTTGCCGTCAGA   | Reverse                |           |
|                      | Bid                    | CCTGTGACCACAACATGAGG   | Forward                |           |
|                      |                        | AAGCTTTTGCCCACTTTCAA   | Reverse                |           |
|                      | Bcl2                   | AAGATTGATGGGATCGTTGC   | Forward                |           |
| GCGGAACACTTGATTCTGGT |                        | Reverse                |                        |           |
| cIAP2                | TATAGGGCAGGGCCTGTATG   | Forward                |                        |           |
|                      | CAGCCTCATTCTCCCTGAAG   | Reverse                |                        |           |
| XIAP                 | GGGGTTCAGTTTCAAGGACA   | Forward                |                        |           |
|                      | CGCCTTAGCTGCTCTTCAGT   | Reverse                |                        |           |
| Housekeeping         | GAPDH                  | TTCACCACCATGGAGAAGG    | Forward                |           |
|                      |                        | CTAAGCAGTTGGTGGTGCAG   | Reverse                |           |

**Table S2. Sequences of siRNA oligos**

| Species    | Function              | Gene                       | Sequence (5' to 3')        | Direction |
|------------|-----------------------|----------------------------|----------------------------|-----------|
| Human      | E3 Ub ligase          | RNF20                      | <b>GGAUAAAGAGAAAGGCAAA</b> | Sense     |
|            |                       |                            | <b>UUUGCCUUUCUCUUUAUCC</b> | Antisense |
|            | Fatty acid metabolism | SREBP1                     | <b>CCACCGUUUCUUCGUGGAU</b> | Sense     |
|            |                       |                            | <b>AUCCACGAAGAAACGGUGG</b> | Antisense |
|            |                       | FASN                       | <b>UCAACCUGGACAGCUCACU</b> | Sense     |
|            |                       |                            | <b>AGUGAGCUGUCCAGGUUGA</b> | Antisense |
| Cell cycle | PTTG1                 | <b>CUCAGAUGAAUGCGGCUGU</b> | Sense                      |           |
|            |                       | <b>ACAGCCGCAUUCAUCUGAG</b> | Antisense                  |           |
